# Supplementary material for: Facial triad modelling using ferrous pyridinyl prolinate complexes: synthesis and catalytic applications
Source: Royal Society of Chemistry journal article supplement (doi:10.1039/c3dt53266f), 2014-01-01
Supplement: c3dt53266f1.pdf [file c3dt53266f1.pdf]

## Supplementary Material

pertaining to

### Facial triad modeling using ferrous pyridinyl proline complexes: synthesis and catalytic applications

Marcel A. H. Moelands<sup>a</sup>, Daniel J. Schamhart<sup>a</sup>, Emma Folkertsma<sup>a</sup>, Martin Lutz<sup>b</sup>, Anthony L. Spek<sup>b</sup>, Robertus J. M. Klein Gebbink<sup>a\*</sup>

<sup>a</sup> Organic Chemistry & Catalysis, Department of Chemistry, Faculty of Science, Utrecht University, Universiteitsweg 99, 3584 CG Utrecht, The Netherlands.

<sup>b</sup> Bijvoet Center for Biomolecular Research, Crystal and Structural Chemistry, Department of Chemistry, Faculty of Science, Utrecht University, Padualaan 8, 3584 CH Utrecht, The Netherlands.

|           |                                                                                                                            |         |
|-----------|----------------------------------------------------------------------------------------------------------------------------|---------|
| Table S1. | Selected bond lengths (Å) and angles (°) for complex <b>10</b> .                                                           | Page 2  |
| Figure S1 | Hydrogen bonded chain (compound <b>10</b> )                                                                                | Page 2  |
| Table S2  | Hydrogen bonding details in <b>10</b>                                                                                      | Page 3  |
| Table S3. | Selected bond lengths (Å) and angles (°) for <b>12b</b> (from MeOH) and <b>12a</b> (from CH <sub>2</sub> Cl <sub>2</sub> ) | Page 3  |
| Figure S2 | Hydrogen bonded chain (compound <b>12b</b> )                                                                               | Page 4  |
| Table S4  | Hydrogen bonding details in <b>12b</b>                                                                                     | Page 4  |
| Table S5. | Selected bond lengths (Å) and angles (°) for complex <b>13</b>                                                             | Page 5  |
| Table S6. | Selected bond lengths (Å) and angles (°) for complex <b>14</b> and <b>15</b>                                               | Page 5  |
| Figure S3 | Hydrogen bonded chain (compound <b>14</b> )                                                                                | Page 6  |
| Table S7  | Hydrogen bonding details in <b>14</b> .                                                                                    | Page 6  |
| Figure S4 | Hydrogen bonded chain (compound <b>15</b> )                                                                                | Page 7  |
| Table S8  | Hydrogen bonding details in <b>15</b> .                                                                                    | Page 7  |
| Table S9  | Selected bond lengths (Å) and angles (°) for complex <b>16</b> and <b>17</b>                                               | Page 8  |
| Figure S5 | Hydrogen bonded chain (compound <b>16</b> )                                                                                | Page 9  |
| Table S10 | Hydrogen bonding details in <b>16</b> .                                                                                    | Page 9  |
| Figure S6 | Hydrogen bonded chain (compound <b>17</b> )                                                                                | Page 10 |
| Table S11 | Hydrogen bonding details in <b>17</b> .                                                                                    | Page 10 |
| Table S12 | Berry pseudo rotations                                                                                                     | Page 11 |
| Graph S1  | Berry pseudo-rotation pathway screening                                                                                    | Page 12 |
| Table S13 | Experimental details of crystal structure of <b>10</b>                                                                     | Page 13 |
| Table S14 | Experimental details of crystal structure of <b>12a</b> and <b>12b</b>                                                     | Page 14 |
| Table S15 | Experimental details of crystal structure of <b>13</b>                                                                     | Page 15 |
| Table S16 | Experimental details of crystal structure of <b>14</b> and <b>15</b>                                                       | Page 16 |
| Table S17 | Experimental details of crystal structure of <b>16</b> and <b>17</b>                                                       | Page 17 |

**Table S1.** Selected bond lengths (Å) and angles (°) for complex **10**.

| Bond length |          | Angle       |            |
|-------------|----------|-------------|------------|
| Fe1-N32     | 2.132(5) | N32-Fe1-N22 | 76.90(17)  |
| Fe1-N22     | 2.197(5) | N32-Fe1-O12 | 151.82(18) |
| Fe1-O12     | 2.146(4) | N22-Fe1-O12 | 75.13(17)  |
| Fe1-N31     | 2.148(5) | N31-Fe1-N21 | 77.26(18)  |
| Fe1-N21     | 2.183(5) | N31-Fe1-O11 | 150.70(17) |
| Fe1-O11     | 2.164(4) | N21-Fe1-O11 | 74.09(17)  |
|             |          | N31-Fe1-N22 | 124.41(19) |
|             |          | N22-Fe1-N21 | 154.94(16) |

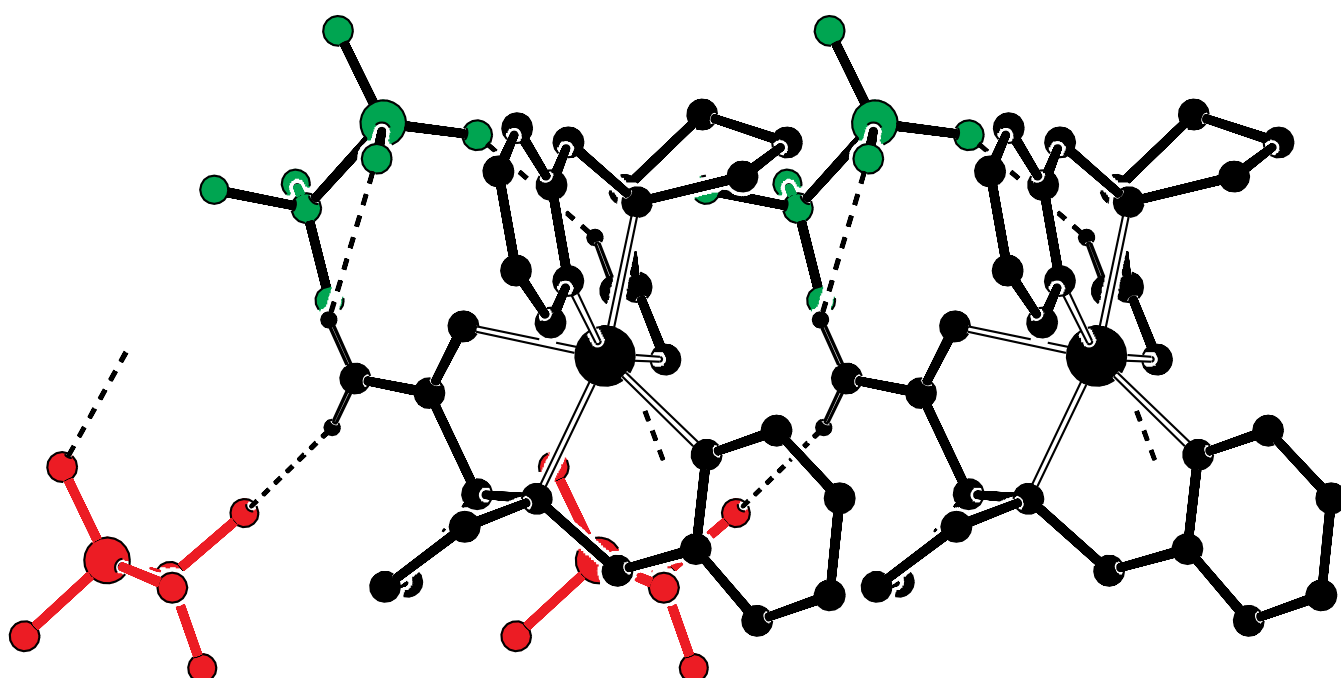

**Fig. S1** Hydrogen-bonded one-dimensional chain in the direction of the a-axis (compound **10**). View along the c-axis. C-H hydrogen atoms are omitted for clarity. Only the major form of the disordered triflate is shown.

**Table S2** Hydrogen bonding details in **10**.

| D-H...A                      | D-H [Å] | H...A [Å] | D...A [Å] | D-H...A [°] |
|------------------------------|---------|-----------|-----------|-------------|
| N11-H11A...O1 <sup>i</sup>   | 0.88    | 2.33      | 3.051(7)  | 139         |
| N11-H11B...F6a <sup>ii</sup> | 0.88    | 2.45      | 3.290(13) | 159         |
| N12-H12A...O4a               | 0.88    | 2.09      | 2.876(9)  | 149         |
| N12-H12B...O3 <sup>i</sup>   | 0.88    | 2.19      | 2.983(7)  | 150         |

Symmetry operations. i: -x, y+0.5, 1-z; ii: x-1, y, z.

**Table S3.** Selected bond lengths (Å) and angles (°) for **12b** (from MeOH) and **12a** (from CH<sub>2</sub>Cl<sub>2</sub>).

|         | Bond lengths |            | Angles      |            |           |
|---------|--------------|------------|-------------|------------|-----------|
|         | <b>12b</b>   | <b>12a</b> | <b>12b</b>  | <b>12a</b> |           |
| Fe1-N1  | 2.1856(14)   | 2.1749(18) | N1-Fe1-N2   | 74.86(5)   | 76.28(6)  |
| Fe1-N2  | 2.2880(13)   | 2.1686(16) | N2-Fe1-O1   | 75.27(5)   | 73.55(6)  |
| Fe1-O1  | 2.2210(12)   | 2.2830(15) | N1-Fe1-Cl1  | 94.71(4)   | 100.95(5) |
| Fe1-Cl1 | 2.4742(5)    | 2.3187(6)  | N1-Fe1-Cl2  | 98.48(4)   | 99.25(5)  |
| Fe1-Cl2 | 2.3303(5)    | 2.2810(6)  | O1-Fe1-Cl1  | 163.93(3)  | 92.60(4)  |
| Fe1-O3  | 2.1554(12)   |            | O1-Fe1-Cl2  | 98.63(3)   | 100.05(4) |
|         |              |            | N1-Fe1-O1   | 86.63(5)   | 149.78(6) |
|         |              |            | Cl1-Fe1-Cl2 | 97.011(18) | 113.01(2) |
|         |              |            | N2-Fe1-Cl2  | 171.04(4)  | 126.96(5) |

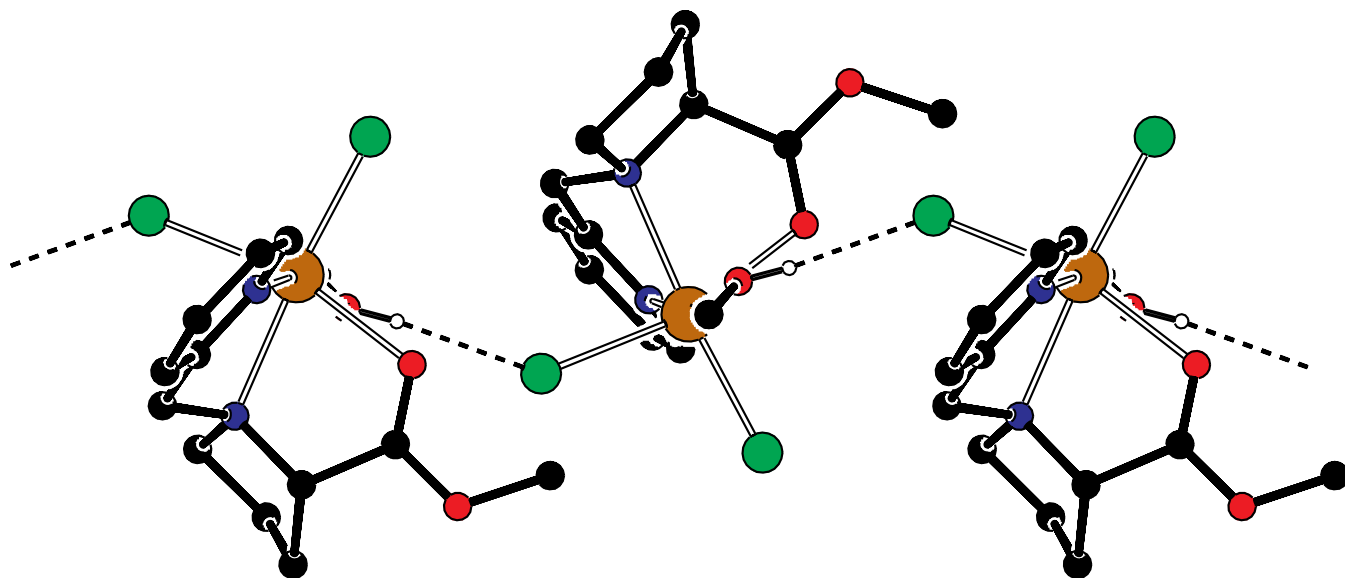

**Fig. S2** Hydrogen-bonded one-dimensional chain in the direction of the b-axis (compound **12b**). View along the a-axis. C-H hydrogen atoms are omitted for clarity.

**Table S4** Hydrogen bonding details in **12b**.

| D-H...A                   | D-H [Å] | H...A [Å] | D...A [Å]  | D-H...A [°] |
|---------------------------|---------|-----------|------------|-------------|
| O3-H3O...Cl1 <sup>i</sup> | 0.77(2) | 2.37(2)   | 3.1221(14) | 165(2)      |

Symmetry operations. i: 1-x, y+0.5, 0.5-z.

**Table S5.** Selected bond lengths (Å) and angles (°) for complex **13**.

|         | Bond length |             | Angle     |  |
|---------|-------------|-------------|-----------|--|
| Fe1-N1  | 2.1866(17)  | N1-Fe1-N2   | 78.53(6)  |  |
| Fe1-N2  | 2.1512(17)  | N2-Fe1-O1   | 75.33(6)  |  |
| Fe1-O1  | 2.2610(15)  | N1-Fe1-Cl1  | 99.88(5)  |  |
| Fe1-Cl1 | 2.3011(6)   | N1-Fe1-Cl2  | 102.73(5) |  |
| Fe1-Cl2 | 2.2804(6)   | O1-Fe1-Cl1  | 88.83(4)  |  |
|         |             | O1-Fe1-Cl2  | 91.23(4)  |  |
|         |             | N1-Fe1-O1   | 153.71(6) |  |
|         |             | Cl1-Fe1-Cl2 | 127.01(2) |  |

**Table S6.** Selected bond lengths (Å) and angles (°) for complex **14** and **15**.

|         | Complex <b>14</b> |            | Complex <b>15</b> |            |             |
|---------|-------------------|------------|-------------------|------------|-------------|
|         | Bond Lengths      |            | Angles            |            |             |
| Fe1-N1  | 2.2264(15)        | 2.1598(11) | N1-Fe1-N2         | 75.37(5)   | 76.51(4)    |
| Fe1-N2  | 2.2319(14)        | 2.2767(11) | N2-Fe1-O1         | 79.18(5)   | 74.81(4)    |
| Fe1-O1  | 2.1176(13)        | 2.0941(11) | N1-Fe1-Cl1        | 168.72(4)  | 104.37(3)   |
| Fe1-Cl1 | 2.4809(5)         | 2.3147(4)  | N1-Fe1-Cl2        | 92.76(4)   | 98.98(3)    |
| Fe1-Cl2 | 2.3873(5)         | 2.3660(4)  | O1-Fe1-Cl1        | 87.97(4)   | 121.53(4)   |
| Fe1-N4  | 2.1900(16)        |            | O1-Fe1-Cl2        | 174.14(4)  | 84.99(3)    |
|         |                   |            | N1-Fe1-O1         | 83.01(5)   | 130.66(4)   |
|         |                   |            | Cl1-Fe1-Cl2       | 95.723(17) | 106.956(15) |
|         |                   |            | N2-Fe1-Cl2        | 95.86(4)   | 147.29(3)   |

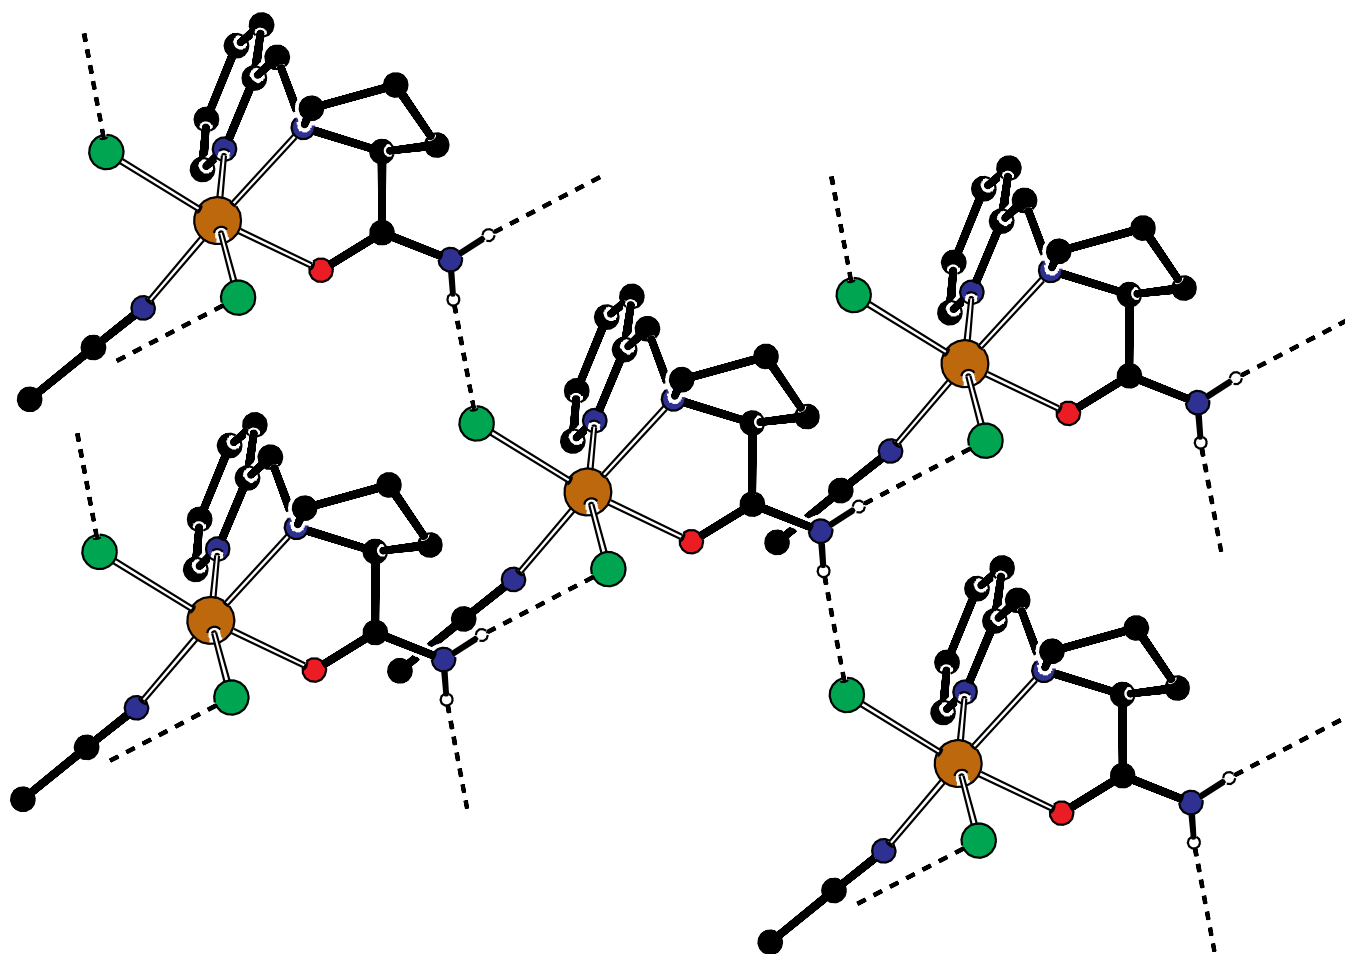

**Fig. S3** Hydrogen-bonded two-dimensional network in the crystallographic  $a,b$ -plane (compound **14**). View along the  $c$ -axis. C-H hydrogen atoms are omitted for clarity.

**Table S7** Hydrogen bonding details in **14**.

| D-H...A                    | D-H [Å] | H...A [Å] | D...A [Å] | D-H...A [°] |
|----------------------------|---------|-----------|-----------|-------------|
| N3-H1N...C11 <sup>i</sup>  | 0.78(2) | 2.46(2)   | 3.237(2)  | 171(2)      |
| N3-H2N...C12 <sup>ii</sup> | 0.80(3) | 2.44(3)   | 3.237(2)  | 174(2)      |

Symmetry operations. i:  $x, y+1, z$ ; ii:  $x+1, y+1, z$ .

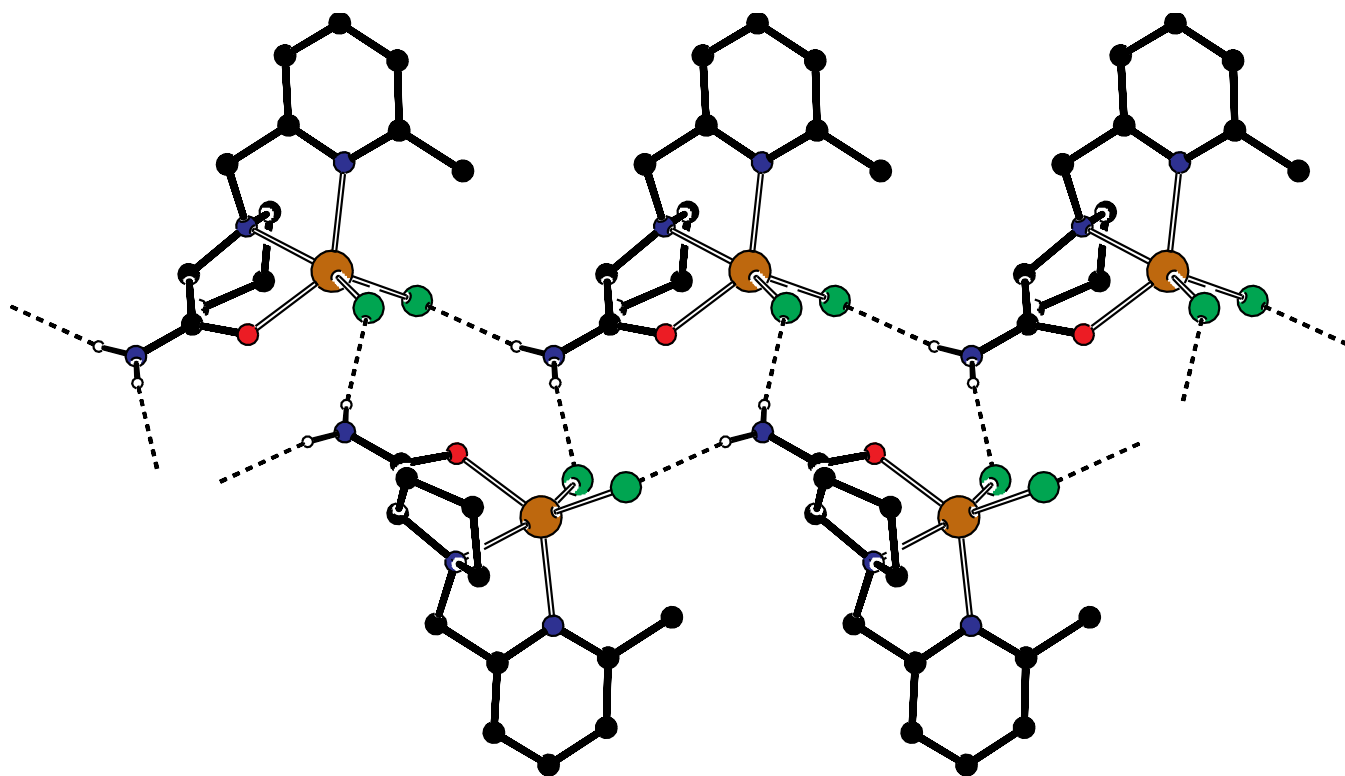

**Fig. S4** Hydrogen-bonded one-dimensional chain in the direction of the b-axis (compound **15**). View along the c-axis. C-H hydrogen atoms are omitted for clarity.

**Table S8** Hydrogen bonding details in **15**.

| D-H...A                    | D-H [Å] | H...A [Å] | D...A [Å]  | D-H...A [°] |
|----------------------------|---------|-----------|------------|-------------|
| N3-H1N...Cl2 <sup>i</sup>  | 0.79(2) | 2.50(2)   | 3.2748(15) | 168(2)      |
| N3-H2N...Cl1 <sup>ii</sup> | 0.84(2) | 2.48(2)   | 3.3117(14) | 170.1(18)   |

Symmetry operations. i: 2-x, y-0.5, 2-z; ii: x, y-1, z.

**Table S9.** Selected bond lengths (Å) and angles (°) for complex **16** and **17**.<sup>[a]</sup>

|               | Complex 16 |            | Complex 17 |            |
|---------------|------------|------------|------------|------------|
|               | Res 1      | Res 2      | Res 1      | Res 2      |
| Bond lengths  |            |            |            |            |
| Fex-N1x       | 2.1227(18) | 2.1354(18) | 2.160(2)   | 2.153(3)   |
| Fex-N2x       | 2.2800(18) | 2.2125(17) | 2.240(3)   | 2.193(3)   |
| Fex-O1x       | 2.0858(15) | 2.1347(14) | 2.123(2)   | 2.1431(19) |
| Fex-Cl1x      | 2.3890(6)  | 2.3666(6)  | 2.2565(9)  | 2.2580(9)  |
| Fex-Cl2x      | 2.2542(6)  | 2.2604(6)  | 2.3825(9)  | 2.3663(9)  |
| Angles        |            |            |            |            |
| N1x-Fex-N2x   | 76.41(7)   | 74.96(7)   | 77.51(10)  | 75.63(10)  |
| N2x-Fex-O1x   | 74.73(6)   | 73.38(6)   | 73.40(9)   | 73.47(8)   |
| N1x-Fex-Cl1x  | 92.30(6)   | 90.88(5)   | 111.38(8)  | 113.58(7)  |
| N1x-Fex-Cl2x  | 112.82(6)  | 113.09(6)  | 92.17(8)   | 90.34(7)   |
| O1x-Fex-Cl1x  | 90.17(4)   | 91.84(4)   | 119.52(6)  | 115.03(6)  |
| O1x-Fex-Cl2x  | 120.13(5)  | 119.68(5)  | 85.67(6)   | 89.86(6)   |
| N1x-Fex-O1x   | 124.63(7)  | 124.56(7)  | 126.54(9)  | 128.07(9)  |
| Cl1x-Fex-Cl2x | 103.77(2)  | 104.17(2)  | 109.76(4)  | 109.71(3)  |

[a] x = residue 1 or 2.



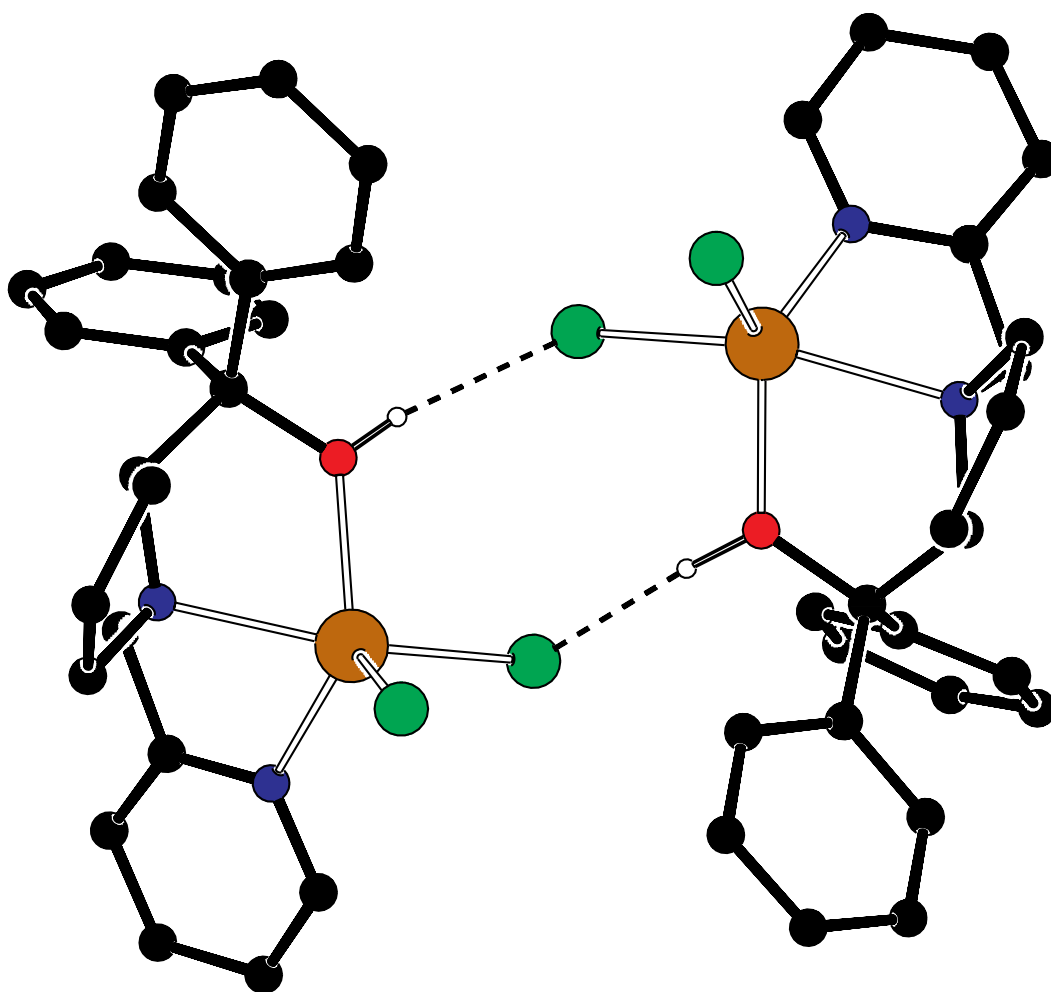

**Fig. S5** Hydrogen-bonded dimer between the two independent molecules of **16**. C-H hydrogen atoms and  $\text{CH}_2\text{Cl}_2$  solvent molecules are omitted for clarity.

**Table S10** Hydrogen bonding details in **16**.

| D-H...A         | D-H [Å] | H...A [Å] | D...A [Å]  | D-H...A [°] |
|-----------------|---------|-----------|------------|-------------|
| O11-H11O...C112 | 1.00    | 2.09      | 3.0818(15) | 175         |
| O12-H12O...C111 | 0.82    | 2.32      | 3.1319(15) | 170         |

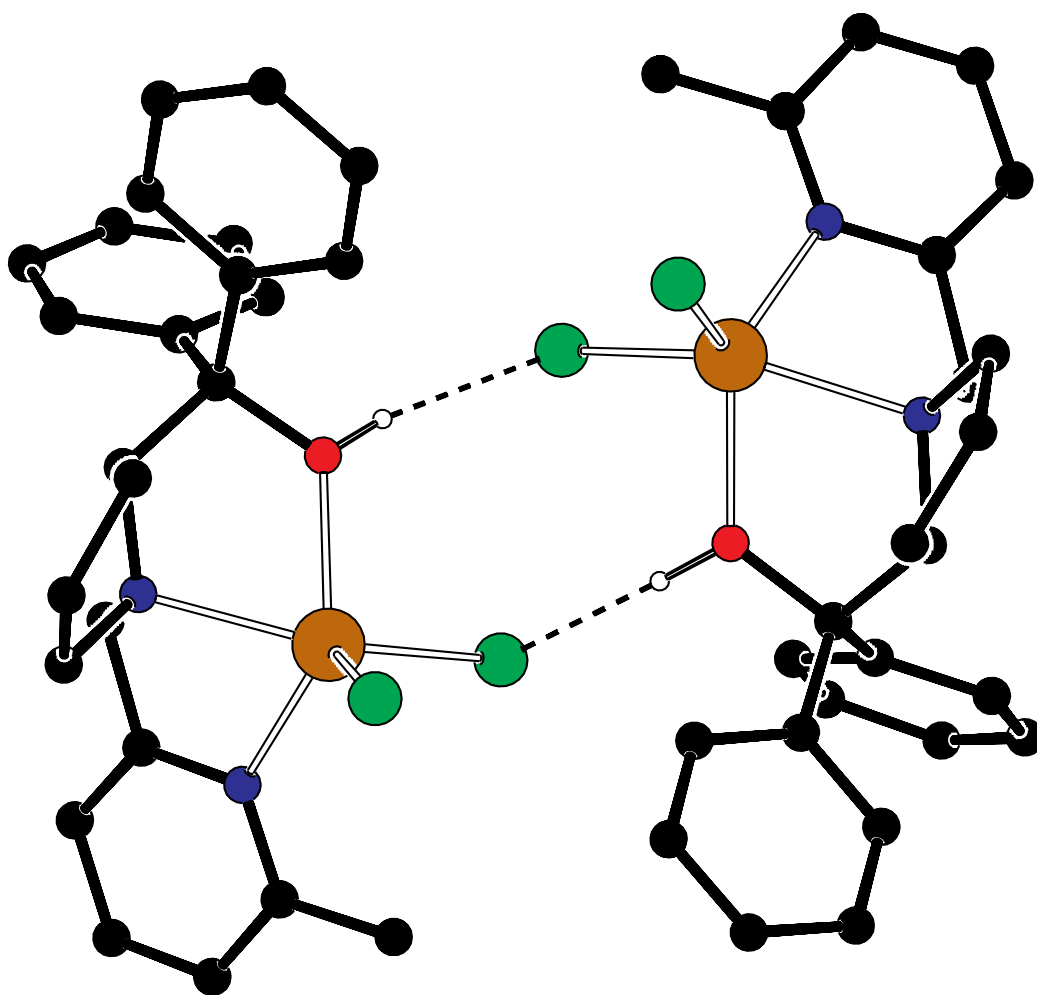

**Fig. S6** Hydrogen-bonded dimer between the two independent molecules of **17**. C-H hydrogen atoms are omitted for clarity.

**Table S11** Hydrogen bonding details in **17**.

| D-H...A         | D-H [Å] | H...A [Å] | D...A [Å] | D-H...A [°] |
|-----------------|---------|-----------|-----------|-------------|
| O11-H11O...Cl22 | 0.97    | 2.10      | 3.069(2)  | 177         |
| O12-H12O...Cl21 | 0.87    | 2.24      | 3.094(2)  | 167         |

**Table S12** Berry pseudorotation.

|         | $\delta_{24}^a$ | $\theta_{24}^a$ | $\theta_{15}^a$ |
|---------|-----------------|-----------------|-----------------|
| 12a     | 39.11           | 126.96(5)       | 149.78(6)       |
| 13      | 44.02           | 115.14(5)       | 153.71(6)       |
| 15      | 14.49           | 130.66(4)       | 147.29(3)       |
| 16_mol1 | 22.24           | 124.63(7)       | 150.14(5)       |
| 16_mol2 | 18.82           | 124.56(7)       | 147.02(5)       |
| 17_mol1 | 14.83           | 126.54(9)       | 143.20(8)       |
| 17_mol2 | 11.69           | 128.07(9)       | 142.72(7)       |

a) for a definition of  $\delta_{24}$ ,  $\theta_{24}$ , and  $\theta_{15}$  see Holmes, R. R. *Progress in Inorganic Chemistry* **1984**, 32, 119-235.

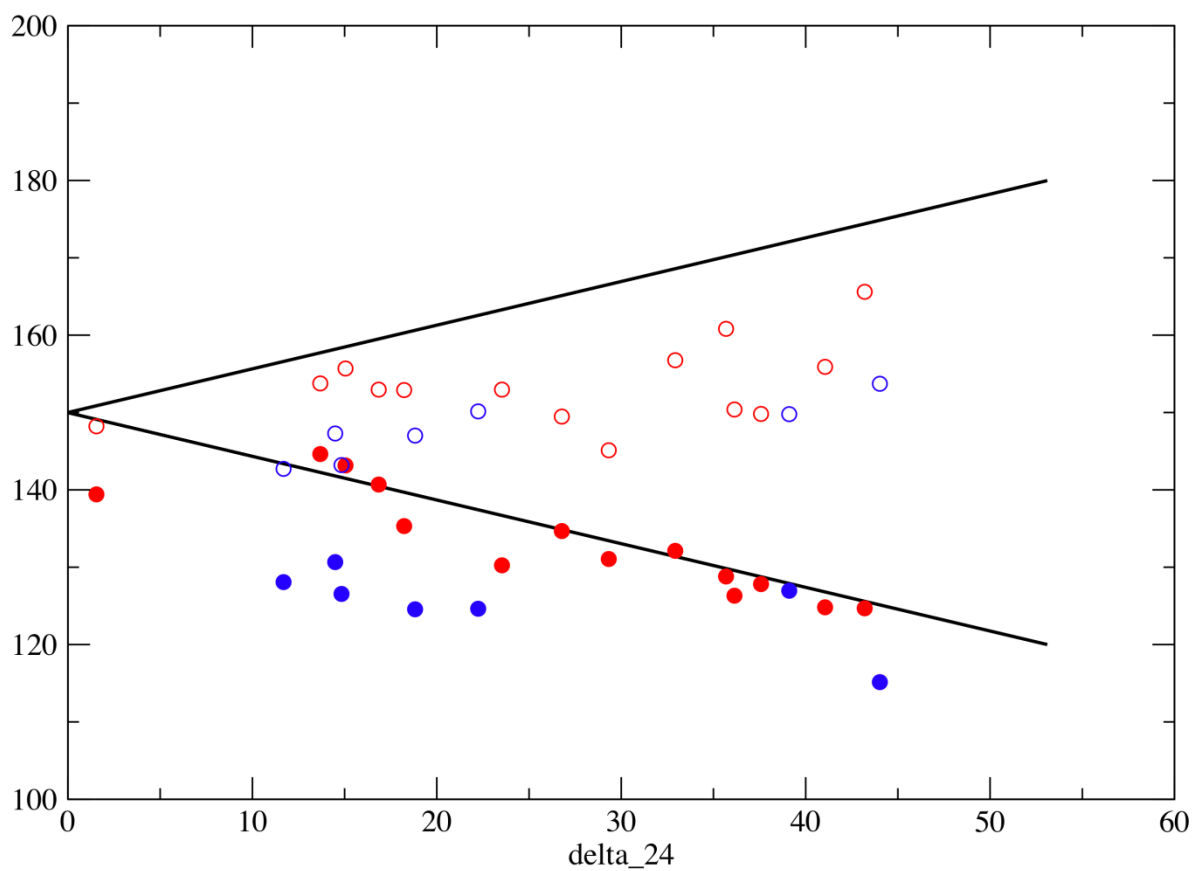

**Graph S1** Graphical representation of the Berry pseudo-rotation pathway screening.

In Graph S1 the results on the Berry pseudo-rotation pathway screening are depicted. The seven structures reported here are represented as the blue dots. The 14 structures extracted from the CSD-database are represented as the red dots.<sup>33</sup> The open circles correspond to the 1,5-angle and the filled circles to the 2,4-angle. Furthermore the theoretical Berry pathway is drawn as the black lines.

**Table S13** Experimental details of crystal structure **10**.

|                                             | <b>10</b>                                                                                                         |
|---------------------------------------------|-------------------------------------------------------------------------------------------------------------------|
| formula                                     | [C <sub>22</sub> H <sub>30</sub> FeN <sub>6</sub> O <sub>2</sub> ](CF <sub>3</sub> O <sub>3</sub> S) <sub>2</sub> |
| Fw                                          | 764.51                                                                                                            |
| crystal colour                              | yellow                                                                                                            |
| crystal size [mm <sup>3</sup> ]             | 0.54x0.08x0.06                                                                                                    |
| T [K]                                       | 150(2)                                                                                                            |
| crystal system                              | monoclinic                                                                                                        |
| space group                                 | P2 <sub>1</sub> (No. 4)                                                                                           |
| a [Å]                                       | 7.0198(6)                                                                                                         |
| b [Å]                                       | 18.956(2)                                                                                                         |
| c [Å]                                       | 11.9392(7)                                                                                                        |
| β [°]                                       | 107.114(3)                                                                                                        |
| V [Å <sup>3</sup> ]                         | 1518.4(2)                                                                                                         |
| Z                                           | 2                                                                                                                 |
| D <sub>calc</sub> [g/cm <sup>3</sup> ]      | 1.672                                                                                                             |
| (sin θ/λ) <sub>max</sub> [Å <sup>-1</sup> ] | 0.61                                                                                                              |
| refl. measured/unique                       | 20320 / 5667                                                                                                      |
| parameters / restraints                     | 517 / 454                                                                                                         |
| R1/wR2 [I>2σ (I)]                           | 0.0317 / 0.0568                                                                                                   |
| R1/wR2 [all refl.]                          | 0.0394 / 0.0595                                                                                                   |
| Flack x <sup>49</sup>                       | 0.00(2)                                                                                                           |
| S                                           | 1.068                                                                                                             |
| ρ (min/max) [eÅ <sup>-3</sup> ]             | -0.26 / 0.27                                                                                                      |

**Table S14** Experimental details of crystal structures **12a** and **12b**.

|                                                           | <b>12a</b>                 | <b>12b</b>                                             |
|-----------------------------------------------------------|----------------------------|--------------------------------------------------------|
| formula                                                   | $C_{12}H_{16}Cl_2FeN_2O_2$ | $C_{13}H_{20}Cl_2FeN_2O_3$                             |
| Fw                                                        | 347.02                     | 379.06                                                 |
| crystal colour                                            | yellow                     | yellow                                                 |
| crystal size [mm <sup>3</sup> ]                           | 0.36x0.18x0.09             | 0.42x0.18x0.12                                         |
| T [K]                                                     | 150(2)                     | 150(2)                                                 |
| crystal system                                            | hexagonal                  | orthorhombic                                           |
| space group                                               | P6 <sub>5</sub> (No. 170)  | P2 <sub>1</sub> 2 <sub>1</sub> 2 <sub>1</sub> (No. 19) |
| a [Å]                                                     | 8.3897(1)                  | 11.5923(1)                                             |
| b [Å]                                                     | -                          | 11.6358(1)                                             |
| c [Å]                                                     | 35.4893(5)                 | 12.1043(2)                                             |
| V [Å <sup>3</sup> ]                                       | 2163.32(5)                 | 1632.70(3)                                             |
| Z                                                         | 6                          | 4                                                      |
| D <sub>calc</sub> [g/cm <sup>3</sup> ]                    | 1.598                      | 1.542                                                  |
| (sin $\theta/\lambda$ ) <sub>max</sub> [Å <sup>-1</sup> ] | 0.65                       | 0.65                                                   |
| refl. measured/unique                                     | 11159 / 3256               | 28909 / 3728                                           |
| parameters / restraints                                   | 173 / 1                    | 196 / 0                                                |
| R1/wR2 [I>2 $\sigma$ (I)]                                 | 0.0252 / 0.0507            | 0.0223 / 0.0491                                        |
| R1/wR2 [all refl.]                                        | 0.0300 / 0.0528            | 0.0251 / 0.0503                                        |
| Flack x <sup>49</sup>                                     | -0.015(11)                 | 0.000(10)                                              |
| S                                                         | 1.072                      | 1.071                                                  |
| $\rho$ (min/max) [eÅ <sup>-3</sup> ]                      | -0.21 / 0.21               | -0.22 / 0.21                                           |

**Table S15** Experimental details of crystal structure **13**.

|                                                           | <b>13</b>                                              |
|-----------------------------------------------------------|--------------------------------------------------------|
| formula                                                   | $C_{13}H_{18}Cl_2FeN_2O_2$                             |
| Fw                                                        | 361.04                                                 |
| crystal colour                                            | yellow                                                 |
| crystal size [mm <sup>3</sup> ]                           | 0.36x0.09x0.09                                         |
| T [K]                                                     | 150(2)                                                 |
| crystal system                                            | orthorhombic                                           |
| space group                                               | P2 <sub>1</sub> 2 <sub>1</sub> 2 <sub>1</sub> (No. 19) |
| a [Å]                                                     | 8.0901(1)                                              |
| b [Å]                                                     | 12.9326(2)                                             |
| c [Å]                                                     | 14.6255(2)                                             |
| V [Å <sup>3</sup> ]                                       | 1530.21(4)                                             |
| Z                                                         | 4                                                      |
| D <sub>calc</sub> [g/cm <sup>3</sup> ]                    | 1.567                                                  |
| (sin $\theta/\lambda$ ) <sub>max</sub> [Å <sup>-1</sup> ] | 0.65                                                   |
| refl. measured/unique                                     | 27410 / 3509                                           |
| parameters / restraints                                   | 183 / 0                                                |
| R1/wR2 [I>2 $\sigma$ (I)]                                 | 0.0271 / 0.0615                                        |
| R1/wR2 [all refl.]                                        | 0.0337 / 0.0647                                        |
| Flack x <sup>49</sup>                                     | -0.012(13)                                             |
| S                                                         | 1.075                                                  |
| $\rho$ (min/max) [eÅ <sup>-3</sup> ]                      | -0.29 / 0.29                                           |

**Table S16** Experimental details of crystal structures **14** and **15**.

|                                                           | <b>14</b>                | <b>15</b>                |
|-----------------------------------------------------------|--------------------------|--------------------------|
| formula                                                   | $C_{13}H_{18}Cl_2FeN_4O$ | $C_{12}H_{17}Cl_2FeN_3O$ |
| Fw                                                        | 373.06                   | 346.04                   |
| crystal colour                                            | yellow                   | yellow                   |
| crystal size [mm <sup>3</sup> ]                           | 0.42x0.18x0.06           | 0.60x0.27x0.18           |
| T [K]                                                     | 110(2)                   | 150(2)                   |
| crystal system                                            | triclinic                | monoclinic               |
| space group                                               | P1 (No. 1)               | P2 <sub>1</sub> (No. 4)  |
| a [Å]                                                     | 6.8899(1)                | 8.89008(11)              |
| b [Å]                                                     | 7.4891(1)                | 8.19097(10)              |
| c [Å]                                                     | 9.0561(1)                | 10.05615(16)             |
| $\alpha$ [°]                                              | 113.7230(8)              | -                        |
| $\beta$ [°]                                               | 92.0237(7)               | 90.575(1)                |
| $\gamma$ [°]                                              | 107.1842(6)              | -                        |
| V [Å <sup>3</sup> ]                                       | 402.305(9)               | 732.236(17)              |
| Z                                                         | 1                        | 2                        |
| D <sub>calc</sub> [g/cm <sup>3</sup> ]                    | 1.540                    | 1.569                    |
| (sin $\theta/\lambda$ ) <sub>max</sub> [Å <sup>-1</sup> ] | 0.65                     | 0.65                     |
| refl. measured/unique                                     | 9765 / 3636              | 26417 / 3374             |
| parameters / restraints                                   | 199 / 3                  | 181 / 1                  |
| R1/wR2 [I>2 $\sigma$ (I)]                                 | 0.0215 / 0.0488          | 0.0154 / 0.0401          |
| R1/wR2 [all refl.]                                        | 0.0229 / 0.0496          | 0.0157 / 0.0404          |
| Flack x <sup>49</sup>                                     | 0.000(9)                 | -0.008(8)                |
| S                                                         | 1.084                    | 1.069                    |
| $\rho$ (min/max) [eÅ <sup>-3</sup> ]                      | -0.21 / 0.25             | -0.27 / 0.26             |



**Table S17** Experimental details of crystal structures **16** and **17**.

|                                             | <b>16</b>                                  | <b>17</b>                |
|---------------------------------------------|--------------------------------------------|--------------------------|
| formula                                     | $C_{23}H_{24}Cl_2FeN_2O \cdot 0.5CH_2Cl_2$ | $C_{24}H_{26}Cl_2FeN_2O$ |
| Fw                                          | 513.66                                     | 485.22                   |
| crystal colour                              | yellow                                     | yellow                   |
| crystal size [mm <sup>3</sup> ]             | 0.48x0.27x0.24                             | 0.36x0.18x0.15           |
| T [K]                                       | 150(2)                                     | 150(2)                   |
| crystal system                              | monoclinic                                 | monoclinic               |
| space group                                 | P2 <sub>1</sub> (No. 4)                    | P2 <sub>1</sub> (No. 4)  |
| a [Å]                                       | 11.2439(1)                                 | 11.1681(2)               |
| b [Å]                                       | 12.5035(1)                                 | 12.3970(2)               |
| c [Å]                                       | 16.7671(2)                                 | 16.8766(3)               |
| β [°]                                       | 101.8532(4)                                | 103.6971(8)              |
| V [Å <sup>3</sup> ]                         | 2306.99(4)                                 | 2270.13(7)               |
| Z                                           | 4                                          | 4                        |
| D <sub>calc</sub> [g/cm <sup>3</sup> ]      | 1.479                                      | 1.420                    |
| (sin θ/λ) <sub>max</sub> [Å <sup>-1</sup> ] | 0.65                                       | 0.65                     |
| refl. measured/unique                       | 38678 / 10555                              | 34625 / 10331            |
| parameters / restraints                     | 550 / 1                                    | 543 / 1                  |
| R1/wR2 [I>2σ (I)]                           | 0.0286 / 0.0712                            | 0.0409 / 0.0846          |
| R1/wR2 [all refl.]                          | 0.0308 / 0.0728                            | 0.0546 / 0.0914          |
| Flack x <sup>49</sup>                       | -0.012(8)                                  | -0.005(11)               |
| S                                           | 1.030                                      | 1.051                    |
| ρ (min/max) [eÅ <sup>-3</sup> ]             | -0.61 / 0.44                               | -0.33 / 0.54             |
